# Supplementary material
Source: Springer Nature journal article supplement (https://www.springermedizin.de/resource/supplementary/12889_2011_3861_MOESM3_ESM.pdf/9490690)
Supplement: MOESM3 [file 9490690]

Initial search

1,100

Publication date (2000 – 2010)

Excluded

Included

280

820

Title review – excluded

88

732

Abstract review – excluded

350

324

Focus on developing countries – excluded

266

58

Focusing on health policy decision making  
(Studies on making clinical decisions on management of individual patients were excluded)

24

34

Providing facilitating factors and barriers

8

26

Snow balling (added 23)-

23

Articles reviewed

49
